# Supplementary material for: Validation of the Mental Health Literacy Scale in French University Students
Source: MDPI journal article supplement (doi:10.3390/bs12080259), 2022-07-28
Supplement: s1 [file s1]

## SUPPLEMENTARY MATERIAL

**Table S1. List of acronyms inspired by the original MHLS according to the classification of O'Connor and Casey (2015)**

|    | Acronym        | Meaning                                       | Dimension                                                                            |
|----|----------------|-----------------------------------------------|--------------------------------------------------------------------------------------|
| 1  | PHO_SOC        | Definition of social phobia                   | Ability to recognise specific disorders or different types of psychological distress |
| 2  | ANX_GEN        | Definition of general anxiety                 |                                                                                      |
| 3  | DEPRESS        | Definition of severe Depression               |                                                                                      |
| 4  | TROU_PERSO     | Definition of personality troubles            |                                                                                      |
| 5  | DYS            | Definition of dysthymia                       |                                                                                      |
| 6  | AGORA          | Definition of agoraphobia                     |                                                                                      |
| 7  | BIPOL          | Definition of bipolar disorder                |                                                                                      |
| 8  | DRUG           | Definition of drug addiction                  |                                                                                      |
| 9  | FEM_RIS_MAL    | Females are more at risk                      | Knowledge and beliefs about risk factors and causes                                  |
| 10 | HOM_RIS_MAL    | Males are more at risk                        |                                                                                      |
| 11 | TCC            | Cognitive-behavioural therapy                 | Knowledge and beliefs about self-help interventions                                  |
| 12 | CONFI_DANG_IMM | Confidentiality about immediate danger        |                                                                                      |
| 13 | CONFI_PROB_ENT | Confidentiality about no danger               |                                                                                      |
| 14 | SOMM           | Sleep quality                                 |                                                                                      |
| 15 | DIF_ANX        | Avoid anxiety                                 |                                                                                      |
| 16 | INFO_MAL       | Access to health information                  | Knowledge of where to seek information                                               |
| 17 | ORDI_INFO      | Digital access to health information          |                                                                                      |
| 18 | QUES_MAL       | Easiness to ask information                   |                                                                                      |
| 19 | RESS_INFO      | Confidence in information sources             |                                                                                      |
| 20 | VOUL_SORT      | Mental health can be self-cured               | Wrong beliefs about mental health                                                    |
| 21 | FRAG_PERS      | Mental health is fragility                    |                                                                                      |
| 22 | MAL_MED        | Mental health is an illness                   |                                                                                      |
| 23 | DANGER         | Impaired mental health is dangerous           |                                                                                      |
| 24 | FREQ_DEV       | Avoid contacting people with mental health    |                                                                                      |
| 25 | DIR_PERS       | Not disclosing a mental illness               |                                                                                      |
| 26 | PAS_FORT       | Not being strong with a mental illness        |                                                                                      |
| 27 | NO_AID         | Not asking for help with a mental illness     |                                                                                      |
| 28 | TRAIT_PAS_EFF  | Treatment is useless                          | Attitudes towards people with a mental health problem                                |
| 29 | HAB_MAL        | Living with someone with a mental illness     |                                                                                      |
| 30 | DISC_MAL       | Discussing with someone with a mental illness |                                                                                      |
| 31 | AMI_MAL        | Friendship with someone with a mental illness |                                                                                      |
| 32 | TRAV_MAL       | Working with someone with a mental illness    |                                                                                      |
| 33 | MARIA_MAL      | Marrying someone with a mental illness        |                                                                                      |
| 34 | POLI_MAL       | Voting for someone with a mental illness      |                                                                                      |
| 35 | EMB_MAL        | Employing someone with a mental illness       |                                                                                      |

**Table S2. Distribution (%) of the answers of the items of the proposed scale (with no inversed items) and test-retest reliability**

| Original MHLS (n=482)                                                                  |                   |           |                           |              | Test-retest reliability<br>CI (CI95%) |
|----------------------------------------------------------------------------------------|-------------------|-----------|---------------------------|--------------|---------------------------------------|
|                                                                                        | Very unlikely     | Unlikely  | Likely                    | Very Likely  |                                       |
| Ability to recognise specific disorders or different types of psychological distress * |                   |           |                           |              |                                       |
| PHO_SOC                                                                                | 6.0               | 24.1      | 61.8                      | 8.1          | 0.511 CI95%= (0.276; 0.688)           |
| ANX_GEN                                                                                | 1.9               | 12.9      | 67.0                      | 18.3         | 0.404 CI95%= (0.147; 0.610)           |
| DEPRESS                                                                                | 3.7               | 25.5      | 54.6                      | 16.2         | 0.251 CI95%= (-0.02; 0.490)           |
| TROU_PERSO                                                                             | 4.4               | 7.1       | 43.8                      | 44.8         | -0.105 CI95%= (-0.36; 0.173)          |
| DYS                                                                                    | 3.3               | 13.3      | 70.1                      | 13.3         | 0.414 CI95%= (0.158; 0.617)           |
| AGORA                                                                                  | 2.7               | 7.9       | 42.9                      | 46.5         | 0.504 CI95%= (0.268; 0.683)           |
| BIPOL                                                                                  | 3.9               | 10.8      | 49.0                      | 36.3         | 0.270 CI95%= (-0.00; 0.505)           |
| DRUG                                                                                   | 2.3               | 3.3       | 25.7                      | 68.7         | 0.240 CI95%= (-0.03; 0.481)           |
| Knowledge and beliefs about self-help interventions *                                  |                   |           |                           |              |                                       |
| FEM_RIS_MAL                                                                            | 16.6              | 32.8      | 37.8                      | 12.9         | 0.626 CI95%= (0.426; 0.768)           |
| HOM_RIS_MAL                                                                            | 20.1              | 53.3      | 24.3                      | 2.3          | 0.555 CI95%= (0.332; 0.719)           |
| Knowledge and beliefs about self-help interventions*                                   |                   |           |                           |              |                                       |
|                                                                                        | Very unhelpful    | Unhelpful | Helpful                   | Very helpful |                                       |
| TCC                                                                                    | 2.1               | 12.7      | 71.0                      | 14.3         | 0.179 CI95%= (-0.09; 0.430)           |
| CONFI_DANG_IMM                                                                         | 5.0               | 5.4       | 36.5                      | 53.1         | 0.296 CI95%= (0.025; 0.526)           |
| CONFI_PROB_ENT                                                                         | 49.4              | 27.8      | 15.6                      | 7.3          | 0.238 CI95%= (-0.03; 0.479)           |
| Knowledge of self-treatment*                                                           |                   |           |                           |              |                                       |
| SOMM                                                                                   | 1.0               | 2.3       | 39.6                      | 57.1         | 0.281 CI95%= (0.008; 0.514)           |
| DIF_ANX                                                                                | 9.5               | 36.3      | 40.0                      | 14.1         | 0.172 CI95%= (-0.10; 0.424)           |
| Knowledge of where to seek information **                                              |                   |           |                           |              |                                       |
|                                                                                        | Strongly Disagree | Disagree  | Neither agree or disagree | Agree        | Strongly agree                        |
| INFO_MAL                                                                               | 2.7               | 23.2      | 19.3                      | 42.9         | 11.8                                  |
| ORDI_INFO                                                                              | 2.1               | 10.6      | 6.8                       | 52.1         | 28.4                                  |
| QUES_MAL                                                                               | 3.9               | 20.3      | 10.6                      | 38.6         | 26.6                                  |
| RESS_INFO                                                                              | 1.5               | 5.2       | 6.4                       | 56.4         | 30.5                                  |
| Attitudes towards people with a mental health problem **                               |                   |           |                           |              |                                       |
| VOUL_SORT                                                                              | 22.4              | 42.7      | 18.3                      | 12.7         | 3.9                                   |
| FRAG_PERS                                                                              | 29.0              | 31.1      | 12.0                      | 25.1         | 2.7                                   |
| MAL_MED (n=141)                                                                        | 67.4              | 27.0      | 2.1                       | 2.1          | 1.4                                   |
| DANGER                                                                                 | 2.9               | 6.6       | 10.6                      | 55.4         | 24.5                                  |

|                      |      |      |      |      |     |                                |
|----------------------|------|------|------|------|-----|--------------------------------|
| <b>FREQ_DEV</b>      | 69.3 | 24.5 | 4.1  | 1.9  | 0.2 | 0.646 CI95%= (0.452;<br>0.781) |
| <b>DIR_PERS</b>      | 22.2 | 42.3 | 17.4 | 16.2 | 1.9 | 0.534 CI95%= (0.305;<br>0.704) |
| <b>PAS_FORT</b>      | 62.2 | 25.3 | 3.3  | 8.3  | 0.8 | 0.530 CI95%= (0.299;<br>0.701) |
| <b>NO_AID</b>        | 44.8 | 35.7 | 9.5  | 8.9  | 1.0 | 0.283 CI95%= (0.010;<br>0.516) |
| <b>TRAIT_PAS_EFF</b> | 30.7 | 45.0 | 16.4 | 6.8  | 1.0 | 0.590 CI95%= (0.376;<br>0.743) |

---

**Stigmatisation\*\***

---

|                  | <b>Definitely<br/>unwilling</b> | <b>Probably<br/>unwilling</b> | <b>Neither<br/>unwilling<br/>or<br/>willing</b> | <b>Probably<br/>willing</b> | <b>Definitely<br/>willing</b> |                                |
|------------------|---------------------------------|-------------------------------|-------------------------------------------------|-----------------------------|-------------------------------|--------------------------------|
| <b>HAB_MAL</b>   | 9.1                             | 20.1                          | 22.2                                            | 32.0                        | 16.6                          | 0.489 CI95%= (0.249;<br>0.672) |
| <b>DISC_MAL</b>  | 0.8                             | 6.0                           | 7.1                                             | 45.0                        | 41.1                          | 0.387 CI95%= (0.127;<br>0.597) |
| <b>AMI_MAL</b>   | 1.5                             | 7.9                           | 14.1                                            | 47.3                        | 29.3                          | 0.615 CI95%= (0.410;<br>0.760) |
| <b>TRAV_MAL</b>  | 1.5                             | 12.9                          | 18.7                                            | 45.6                        | 21.4                          | 0.544 CI95%= (0.317;<br>0.711) |
| <b>MARIA_MAL</b> | 5.6                             | 12.2                          | 19.5                                            | 34.9                        | 27.8                          | 0.584 CI95%= (0.369;<br>0.738) |
| <b>POLI_MAL</b>  | 14.3                            | 21.6                          | 24.9                                            | 26.3                        | 12.9                          | 0.748 CI95%= (0.596;<br>0.847) |
| <b>EMB_MAL</b>   | 2.5                             | 15.1                          | 23.4                                            | 44.4                        | 14.5                          | 0.664 CI95%= (0.477;<br>0.793) |

\*Score from 1 to 4

\*\*Score from 1 to 5

**Table S3. Distribution (%) of the answers of the items of the proposed scale  
MHLS (with inversed items)**

|                                                                                            | Total | Male  | Female | p<br>value   | Hum.SS | TecSc | HelathS | Law-E  | p value      |
|--------------------------------------------------------------------------------------------|-------|-------|--------|--------------|--------|-------|---------|--------|--------------|
| <b>Ability to recognize disorders: Likey or Very Likely (≥3)</b>                           |       |       |        |              |        |       |         |        |              |
| PHO_SOC                                                                                    | 69.9% | 63.8% | 72.7%  | <b>0.047</b> | 82.5%  | 60.0% | 63.3%   | 75.9%  | <b>0.002</b> |
| ANX_GEN                                                                                    | 85.3% | 81.6% | 87.0%  | <b>0.121</b> | 91.2%  | 85.3% | 78.4%   | 88.5%  | <b>0.039</b> |
| DEPRESS                                                                                    | 70.7% | 75.0% | 68.8%  | <b>0.164</b> | 68.4%  | 75.8% | 69.1%   | 70.2%  | <b>0.673</b> |
| TROU_PERS                                                                                  | 88.6% | 86.8% | 89.4%  | <b>0.413</b> | 91.2%  | 87.4% | 87.1%   | 89.5%  | <b>0.795</b> |
| DYS                                                                                        | 83.4% | 75.7% | 87.0%  | <b>0.002</b> | 84.2%  | 77.9% | 79.1%   | 89.0%  | <b>0.041</b> |
| AGORA                                                                                      | 89.4% | 87.5% | 90.3%  | <b>0.353</b> | 91.2%  | 88.4% | 87.8%   | 90.6%  | <b>0.809</b> |
| BIPOL                                                                                      | 85.3% | 80.3% | 87.6%  | <b>0.035</b> | 87.7%  | 81.1% | 82.0%   | 89.0%  | <b>0.178</b> |
| DRUG                                                                                       | 94.4% | 92.8% | 95.2%  | <b>0.289</b> | 96.5%  | 90.5% | 92.8%   | 96.9%  | <b>0.111</b> |
| <b>Knowledge of risk factors and causes: Likey or Very Likely (≥3)</b>                     |       |       |        |              |        |       |         |        |              |
| FEM_RIS_MAL                                                                                | 50.6% | 44.1% | 53.6%  | <b>0.051</b> | 47.4%  | 46.3% | 43.9%   | 58.6%  | <b>0.039</b> |
| HOM_RIS_MAL_R*                                                                             | 73.4% | 69.7% | 75.2%  | <b>0.211</b> | 68.4%  | 76.8% | 70.5%   | 75.4%  | <b>0.515</b> |
| <b>Knowledge of professional help available: Likey or Very Likely (≥3)</b>                 |       |       |        |              |        |       |         |        |              |
| TCC                                                                                        | 85.3% | 78.9% | 88.2%  | <b>0.008</b> | 84.2%  | 75.8% | 82.0%   | 92.7%  | <b>0.001</b> |
| CONFI_DANG_IMM                                                                             | 89.6% | 88.8% | 90.0%  | <b>0.692</b> | 93.0%  | 90.5% | 86.3%   | 90.6%  | <b>0.461</b> |
| CONFI_PROB_ENT_R                                                                           | 77.2% | 73.7% | 78.8%  | <b>0.215</b> | 84.2%  | 74.7% | 74.8%   | 78.0%  | <b>0.487</b> |
| <b>Knowledge of self-treatment Agree or Strongly agree (≥3)</b>                            |       |       |        |              |        |       |         |        |              |
| SOMM                                                                                       | 96.7% | 96.1% | 97.0%  | <b>0.602</b> | 96.5%  | 96.8% | 94.2%   | 98.4%  | <b>0.221</b> |
| DIF_ANX_R*                                                                                 | 45.9% | 39.5% | 48.8%  | <b>0.057</b> | 56.1%  | 52.6% | 36.0%   | 46.6%  | <b>0.021</b> |
| <b>Knowledge of where to seek information</b>                                              |       |       |        |              |        |       |         |        |              |
| INFO_MAL                                                                                   | 54.8% | 59.2% | 52.7%  | <b>0.184</b> | 59.6%  | 60.0% | 46.0%   | 57.1%  | <b>0.099</b> |
| ORDI_INFO                                                                                  | 80.5% | 84.9% | 78.5%  | <b>0.100</b> | 86.0%  | 86.3% | 77.7%   | 78.0%  | <b>0.205</b> |
| QUES_MAL                                                                                   | 65.1% | 61.8% | 66.7%  | <b>0.302</b> | 66.7%  | 67.4% | 59.7%   | 67.5%  | <b>0.466</b> |
| RESS_INFO                                                                                  | 86.9% | 85.5% | 87.6%  | <b>0.535</b> | 87.7%  | 88.4% | 82.7%   | 89.0%  | <b>0.377</b> |
| <b>Attitudes towards people with a mental health problem: Agree or Strongly agree (≥4)</b> |       |       |        |              |        |       |         |        |              |
| VOUL_SORT_R*                                                                               | 65.1% | 65.8% | 64.8%  | <b>0.840</b> | 63.2%  | 62.1% | 60.4%   | 70.7%  | <b>0.219</b> |
| FRAG_PERS_R*                                                                               | 60.2% | 55.9% | 62.1%  | <b>0.196</b> | 54.4%  | 62.1% | 58.3%   | 62.3%  | <b>0.679</b> |
| MAL_MED_R* (n=141)                                                                         | 94.3% | 84.4% | 97.2%  | <b>0.006</b> | 100.0% | 95.5% | 88.0%   | 100.0% | <b>0.083</b> |
| DANGER_R*                                                                                  | 9.5%  | 11.2% | 8.8%   | <b>0.405</b> | 7.0%   | 16.8% | 9.4%    | 6.8%   | <b>0.047</b> |
| FREQ_DEV_R*                                                                                | 93.8% | 90.8% | 95.2%  | <b>0.065</b> | 94.7%  | 95.8% | 92.1%   | 93.7%  | <b>0.698</b> |
| DIR_PERS_R*                                                                                | 64.5% | 60.5% | 66.4%  | <b>0.213</b> | 50.9%  | 68.4% | 64.0%   | 67.0%  | <b>0.122</b> |
| PAS_FORT_R*                                                                                | 87.6% | 82.9% | 89.7%  | <b>0.036</b> | 86.0%  | 85.3% | 88.5%   | 88.5%  | <b>0.837</b> |
| NO_AID_R*                                                                                  | 80.5% | 76.3% | 82.4%  | <b>0.116</b> | 82.5%  | 82.1% | 77.0%   | 81.7%  | <b>0.668</b> |
| TRAIT_PAS EFF_R*                                                                           | 75.7% | 73.7% | 76.7%  | <b>0.478</b> | 71.9%  | 68.4% | 69.8%   | 84.8%  | <b>0.002</b> |
| <b>Stigmatisation: Probably willing or Definitely willing (≥4)</b>                         |       |       |        |              |        |       |         |        |              |
| HAB_MAL                                                                                    | 48.5% | 54.6% | 45.8%  | <b>0.071</b> | 54.4%  | 56.8% | 38.8%   | 49.7%  | <b>0.033</b> |
| DISC_MAL                                                                                   | 86.1% | 83.6% | 87.3%  | <b>0.273</b> | 93.0%  | 82.1% | 85.6%   | 86.4%  | <b>0.313</b> |
| AMI_MAL                                                                                    | 76.6% | 76.3% | 76.7%  | <b>0.933</b> | 87.7%  | 76.8% | 70.5%   | 77.5%  | <b>0.075</b> |
| TRAV_MAL                                                                                   | 67.0% | 65.1% | 67.9%  | <b>0.551</b> | 71.9%  | 68.4% | 63.3%   | 67.5%  | <b>0.661</b> |
| MARIA_MAL                                                                                  | 62.7% | 67.8% | 60.3%  | <b>0.116</b> | 73.7%  | 74.7% | 55.4%   | 58.6%  | <b>0.004</b> |
| POLI_MAL                                                                                   | 39.2% | 48.0% | 35.2%  | <b>0.007</b> | 42.1%  | 45.3% | 38.1%   | 36.1%  | <b>0.477</b> |
| EMB_MAL                                                                                    | 58.9% | 57.2% | 59.7%  | <b>0.610</b> | 63.2%  | 55.8% | 56.8%   | 60.7%  | <b>0.725</b> |

\*R: reversed score

**Table S4. Scores of the scale and the factors: description, reliability, internal consistency and test-retest reliability**

|             | <b>Total<br/>Mean (SD)</b> | <b>Range</b> | <b>Cronbach's alpha</b> | <b>McDonald<br/>Omega</b> | <b>ICC: IC95% (n=51)</b>     |
|-------------|----------------------------|--------------|-------------------------|---------------------------|------------------------------|
| F1          | 22,08 (2,78)               | 10-28        | 0,643                   | 0,872                     | 0,772 IC95%= (0,601; 0,870)  |
| F2          | 4,56 (1,33)                | 2-8          | 0,453                   | 0,625                     | 0,637 IC95%= (0,365; 0,793)  |
| F3          | 6,35 (1,10)                | 2-8          | 0,343                   | 0,666                     | 0,291 IC95%= (-0,242; 0,595) |
| F4          | 15,05 (2,77)               | 5-20         | 0,608                   | 0,797                     | 0,908 IC95%= (0,838; 0,947)  |
| F5          | 17,12 (2,40)               | 8-20         | 0,595                   | 0,796                     | 0,793 IC95%= (0,637; 0,882)  |
| F6          | 25,36 (5,15)               | 11-35        | 0,815                   | 0,873                     | 0,867 IC95%= (0,7671; 0,924) |
| Total Scale | 90,52 (8,95)               | 60-115       | 0,765                   | 0,961                     | 0,869 IC95%= (0,770; 0,925)  |

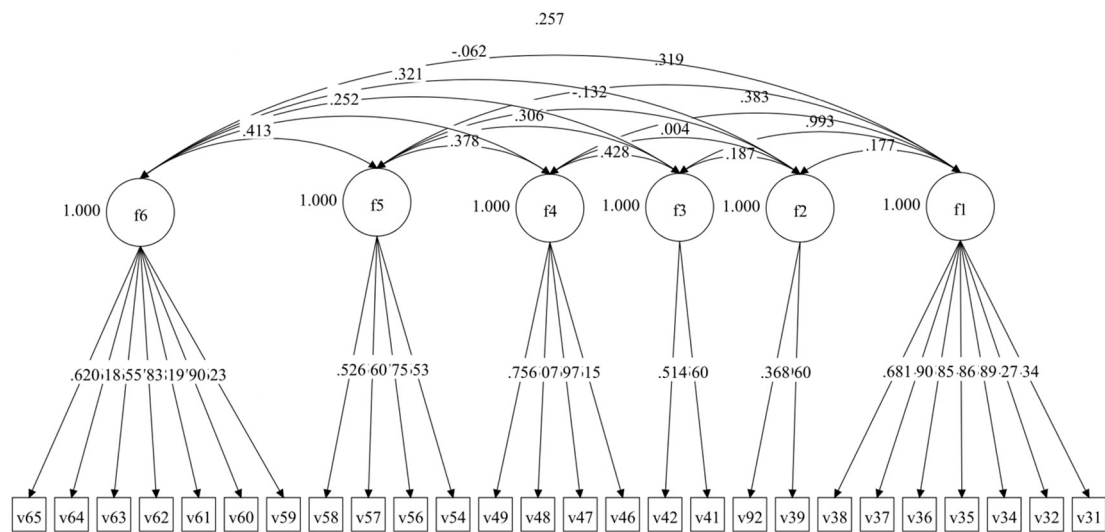

**Figure S1. Representation of the confirmatory factor analyses**
